# Supplementary material for: Standing Desks in a Grade 4 Classroom over the Full School Year
Source: MDPI journal article supplement (doi:10.3390/ijerph16193590), 2019-09-25
Supplement: s1 [file s1]

**Supplementary table:**

Table S1. Sitting and standing time at the start and the end of the school year

|                                                                        | <b>Start of school<br/>year</b> | <b>End of school year</b> |
|------------------------------------------------------------------------|---------------------------------|---------------------------|
| <b>Standing desk</b>                                                   |                                 |                           |
| <b>Standing time</b><br>(mins/school day (95%<br>confidence intervals) | 81 (64 to 94)^                  | 95 (84 to 107)^           |
| <b>Sitting time</b><br>(mins/school day (95%<br>confidence intervals)  | 211 (198 to 224)*               | 175 (164 to 187)*         |
| <b>Traditional seated desk</b>                                         |                                 |                           |
| <b>Standing time</b><br>(mins/school day (95%<br>confidence intervals) | 64 (53 to 76)^                  | 69 (58 to 81)^            |
| <b>Sitting time</b><br>(mins/school day (95%<br>confidence intervals)  | 228 (217 to 239)*               | 215 (203 to 226)*         |

\* Significant reduction in sitting time when using a standing desk at both time points

^ Significant increase in standing time when using a standing desk at both time points
